# Supplementary material
Source: publisher figshare collection journal article supplement (https://acs.figshare.com/ndownloader/files/3763720)
Supplement: Supplementary file 1 [file 3763720]

EFFECT OF PREGNANCY ON THE DISPOSITION OF  
2,2',3,5',6-PENTACHLOROBIPHENYL (PCB 95)  
ATROPISOMERS AND THEIR HYDROXYLATED  
METABOLITES IN FEMALE MICE

**Supporting Information**

*Izabela Kania-Korwel<sup>a</sup>, Christopher D. Barnhart<sup>b</sup>, Pamela J. Lein<sup>b</sup>, Hans-Joachim Lehmler<sup>a\*</sup>*

<sup>a</sup> Department of Occupational and Environmental Health, College of Public Health, The University of Iowa, Iowa City, Iowa; <sup>b</sup> Department of Molecular Biosciences, School of Veterinary Medicine, University of California, Davis, California.

**\*CORRESPONDING AUTHOR**

Dr. Hans-Joachim Lehmler, The University of Iowa,

Department of Occupational and Environmental Health,

University of Iowa Research Park, #221 IREH, Iowa City, IA 52242-5000

Phone: (319) 335-4310, Fax: (319) 335-4290, e-mail: [hans-joachim-lehmler@uiowa.edu](mailto:hans-joachim-lehmler@uiowa.edu)

## TABLE OF CONTENT:

|                                                                                                                                                                                       |         |
|---------------------------------------------------------------------------------------------------------------------------------------------------------------------------------------|---------|
| Abbreviations                                                                                                                                                                         | Page 3  |
| References                                                                                                                                                                            | Page 4  |
| Table S1. Quality assurance/quality control data for gas chromatographic quantification of PCB 95 and metabolites in tissues                                                          | Page 5  |
| Table S2. Final body weights and organ to body weight ratios of dams exposed to racemic PCB 95 throughout gestation and lactation                                                     | Page 6  |
| Table S3A. Levels of PCB 95 in tissues of dams exposed to racemic PCB 95 during gestation and lactation increased with increasing dose                                                | Page 7  |
| Table S3B. Comparison of PCB 95 levels in tissues from dams <i>versus</i> non-pregnant adult age-matched congenic female mice exposed to racemic PCB 95                               | Page 8  |
| Table S4A. Levels of hydroxylated metabolites of PCB 95 in tissues from dams exposed to racemic PCB 95 during gestation and lactation increased with increasing dose                  | Page 9  |
| Table S4B. Comparison of tissue levels of hydroxylated metabolites of PCB 95 in dams <i>versus</i> age-matched congenic female mice exposed to racemic PCB 95                         | Page 10 |
| Table S5A. Atropisomeric enrichment of PCB 95 in tissues from dams exposed to racemic PCB 95 during gestation and lactation was independent of dose                                   | Page 11 |
| Table S5B. Comparison of atropisomeric enrichment of PCB 95 in tissues from dams <i>versus</i> age-matched congenic female mice exposed to racemic PCB 95                             | Page 12 |
| Table S6A. Atropisomeric enrichment of hydroxylated metabolites of PCB 95 in tissues from dams exposed to racemic PCB 95 during gestation and lactation was independent of dose       | Page 13 |
| Table S6B. Comparison of atropisomeric enrichment of hydroxylated metabolites of PCB 95 in tissues from dams <i>versus</i> age-matched congenic female mice exposed to racemic PCB 95 | Page 14 |
| Table S7. Levels and atropisomeric enrichment of PCB 95 in blood and liver from pups exposed to racemic PCB 95 via the maternal diet                                                  | Page 15 |
| Table S8. Levels of hydroxylated metabolites of PCB 95 in blood and liver from pups exposed to racemic PCB 95 via the maternal diet                                                   | Page 16 |
| Table S9. Atropisomeric enrichment of selected chiral PCBs in extracts from human brain samples.                                                                                      | Page 17 |
| Description of atropselective analysis of human brain samples                                                                                                                         | Page 18 |

**ABBREVIATIONS:**

|         |                                                                                   |
|---------|-----------------------------------------------------------------------------------|
| 4-95    | 2,2',3,5',6-pentachlorobiphenyl-4-ol                                              |
| 5-95    | 2,2',3,5',6-pentachlorobiphenyl-5-ol                                              |
| X'-95   | unidentified mono-hydroxylated metabolite of PCB 95                               |
| 4,5-95  | 2,2',3,5',6-pentachlorobiphenyl-4,5-diol                                          |
| ASD     | autism spectrum disorder                                                          |
| BDM     | ChiralDex B-DM column (2,3-di-O-methyl-6-tert-butyl-silyl- $\beta$ -cyclodextrin) |
| CD      | Chirasil-Dex enantioselective column: (2,3,6-tri-O-methyl- $\beta$ -cyclodextrin) |
| EF      | enantiomeric fraction                                                             |
| HS-SPME | head space-solid phase microextraction                                            |
| MDL     | method detection limit                                                            |
| ND      | below detection limit                                                             |
| NR      | not resolved                                                                      |

**Table S1.** Quality assurance/quality control data for gas chromatographic quantification of PCB 95 and metabolites in tissues.

|                              | PCB 95      | 3-103       | 4-95        | 4'-95       | 5-95        | 4,5-95      |
|------------------------------|-------------|-------------|-------------|-------------|-------------|-------------|
| <b>Adipose</b>               |             |             |             |             |             |             |
| Mean tissue mass [g]         | 0.27 ± 0.14 |             |             |             |             |             |
| MDL <sup>a</sup> [ng] (n=9)  | 0.23        | ND          | ND          | 9.1         | 0.15        | 0.37        |
| MDL <sup>b</sup> [ng/g]      | 0.84        | ND          | ND          | 33          | 0.55        | 1.4         |
| Control animals [ng/g] (n=2) | 1.0 ± 1.0   | ND          | ND          | ND          | ND          | ND          |
| <b>Blood</b>                 |             |             |             |             |             |             |
| Mean tissue mass [g]         | 0.32 ± 0.14 |             |             |             |             |             |
| MDL <sup>a</sup> [ng] (n=23) | 1.6         | 0.60        | 0.83        | 1.1         | 0.82        | 1.9         |
| MDL <sup>b</sup> [ng/g]      | 5.0         | 1.9         | 2.6         | 3.4         | 2.6         | 5.9         |
| Control animals [ng/g] (n=7) | 0.47 ± 0.61 | 0.15 ± 0.30 | 2.0 ± 2.9   | 0.03 ± 0.06 | 4.1 ± 9.7   | 2.7 ± 6.5   |
| <b>Brain</b>                 |             |             |             |             |             |             |
| Mean tissue mass [g]         | 0.23 ± 0.10 |             |             |             |             |             |
| MDL <sup>a</sup> [ng] (n=7)  | 1.2         | ND          | 0.56        | ND          | 0.74        | 1.3         |
| MDL <sup>b</sup> [ng/g]      | 5.1         | ND          | 2.4         | ND          | 3.2         | 5.6         |
| Control animals [ng/g] (n=2) | 2.8 ± 2.8   | ND          | ND          | ND          | 3.0 ± 0.4   | 9.9 ± 6.8   |
| <b>Liver</b>                 |             |             |             |             |             |             |
| Mean tissue mass [g]         | 1.54 ± 0.64 |             |             |             |             |             |
| MDL <sup>a</sup> [ng] (n=10) | 1.5         | 0.27        | 0.96        | 0.77        | 0.43        | 1.2         |
| MDL <sup>b</sup> [ng/g]      | 0.96        | 0.17        | 0.63        | 0.50        | 0.28        | 0.77        |
| Control animals [ng/g] (n=4) | 0.3 ± 0.3   | 0.02 ± 0.02 | 0.26 ± 0.14 | 0.14 ± 0.14 | 0.06 ± 0.04 | 0.03 ± 0.02 |

<sup>a</sup> Method Detection Limit (MDL) was determined from blank samples (i.e. samples containing only chemicals used in the analytical procedure and subjected to same extraction and clean-up process as real samples), as described previously by Kania-Korwel *et al.* (2007).<sup>1</sup>

<sup>b</sup> Determined by dividing the MDL by the average mass of tissue used for extraction.<sup>2</sup> Data presented as mean ± standard deviation. For analysis details, see Experimental procedures.

**Table S2.** Final body weights and organ to body weight ratios of dams exposed to racemic PCB 95 throughout gestation and lactation.

| Dose<br>(mg/kg b.w./d,<br>p.o.) | Pregnancy<br>weight gain<br>(g) | Birth weight<br>loss<br>(g) | Weight<br>change<br>during<br>lactation (g) | Overall<br>weight gain<br>(g) | Final weight<br>(g)  | Liver to final<br>body weight<br>ratio (%) | Brain to final<br>body weight<br>ratio (%) |
|---------------------------------|---------------------------------|-----------------------------|---------------------------------------------|-------------------------------|----------------------|--------------------------------------------|--------------------------------------------|
| 0                               | 19.2 ± 2.4<br>(n=8)             | 12.2 ± 2.1<br>(n=8)         | 1.1 ± 2.0<br>(n=8)                          | 8.1 ± 2.3<br>(n=8)            | 29.2 ± 2.0<br>(n=8)  | 6.5 ± 3.5<br>(n=4)                         | 0.52 ± 0.39<br>(n=2)                       |
| 0.1                             | 20.1 ± 2.2<br>(n=10)            | 12.8 ± 2.4<br>(n=10)        | 1.1 ± 1.8<br>(n=10)                         | 8.3 ± 1.7<br>(n=10)           | 28.6 ± 2.0<br>(n=10) | 5.3 ± 1.6<br>(n=10)                        | 0.90 ± 0.27<br>(n=8)                       |
| 1                               | 20.5 ± 1.1<br>(n=5)             | 12.0 ± 1.4<br>(n=5)         | 0.3 ± 1.4<br>(n=5)                          | 8.7 ± 2.3<br>(n=5)            | 28.7 ± 1.5<br>(n=5)  | 5.3 ± 2.2<br>(n=5)                         | 1.1 ± 0.38<br>(n=5)                        |
| 6                               | 18.2 ± 2.7<br>(n=8)             | 10.7 ± 1.8<br>(n=8)         | 1.2 ± 1.4<br>(n=8)                          | 8.7 ± 1.2<br>(n=8)            | 28.8 ± 1.2<br>(n=8)  | 5.0 ± 1.9<br>(n=8)                         | 0.60 ± 0.05<br>(n=7)                       |

Data presented as mean ± standard deviation.

**Table S3A.** Levels of PCB 95 in tissues of dams exposed to racemic PCB 95 during gestation and lactation increased with increasing dose.

|                              | Tissue level (ng/g wet weight)      |                                 |                                 |                                  |
|------------------------------|-------------------------------------|---------------------------------|---------------------------------|----------------------------------|
| Dose<br>(mg/kg b.w./d, p.o.) | <b>Adipose</b>                      | <b>Blood</b>                    | <b>Brain</b>                    | <b>Liver</b>                     |
| 0.1                          | 170 ± 110<br>(n=9)                  | 2.6 ± 1.0 <sup>‡</sup><br>(n=8) | 3.7 ± 0.9 <sup>‡</sup><br>(n=8) | 12 ± 7.0<br>(n=10)               |
| 1                            | 2000 ± 590*<br>(n=4)                | 14 ± 4.9<br>(n=5)               | 31 ± 11<br>(n=7)                | 100 ± 48<br>(n=6)                |
| 6                            | 11600 ± 2200* <sup>#</sup><br>(n=2) | 52 ± 23 <sup>#</sup><br>(n=7)   | 140 ± 43 <sup>#</sup><br>(n=7)  | 700 ± 240* <sup>#</sup><br>(n=8) |

<sup>‡</sup> Levels below detection limit (see Table S1 for QA/QC values).

\* Significantly higher than 0.1 mg/kg/d treatment group, p<0.05.

<sup>#</sup> Significantly higher than 1 mg/kg/d treatment group.

Data presented as mean ± standard deviation.

**Table S3B.** Comparison of PCB 95 levels in tissues from dams *versus* non-pregnant adult age-matched congenic female mice exposed to racemic PCB 95.

| Tissue  | Dose<br>[mg/kg b.w./d, p.o.] | Tissue level (ng/g wet weight) |                                  |
|---------|------------------------------|--------------------------------|----------------------------------|
|         |                              | <b>Dams<sup>a</sup></b>        | <b>Adult females<sup>b</sup></b> |
| Adipose | 0.1                          | 170 ± 110                      | 1800 ± 500 <sup>#</sup>          |
|         | 1                            | 2000 ± 590                     | 20000 ± 1600                     |
|         | 6                            | 11600 ± 2200                   | 47000 ± 2000                     |
| Blood   | 0.1                          | 2.6 ± 1.0                      | 9.8 ± 2.2                        |
|         | 1                            | 14 ± 4.9                       | 60 ± 20 <sup>#</sup>             |
|         | 6                            | 52 ± 23                        | 180 ± 50 <sup>#</sup>            |
| Brain   | 0.1                          | 3.7 ± 0.87                     | 37 ± 12                          |
|         | 1                            | 31 ± 11                        | 100 ± 24 <sup>#</sup>            |
|         | 6                            | 140 ± 43                       | 360 ± 72 <sup>#</sup>            |
| Liver   | 0.1                          | 12 ± 7.0                       | 87 ± 23 <sup>#</sup>             |
|         | 1                            | 100 ± 48                       | 360 ± 48 <sup>#</sup>            |
|         | 6                            | 700 ± 240                      | 1200 ± 90 <sup>#</sup>           |

<sup>a</sup> Dams were dosed daily throughout gestation and lactation for 56 days as described under Experimental procedures.

<sup>b</sup> Adult female mice were dosed daily with racemic PCB 95 for 39 days as reported earlier by Kania-Korwel *et al.* (2012).<sup>2</sup>

<sup>#</sup> Significantly higher than 1 mg/kg/d treatment group.

Data presented as mean ± standard deviation.

**Table S4A.** Levels of hydroxylated metabolites of PCB 95 in tissues from dams exposed to racemic PCB 95 during gestation and lactation increased with increasing dose.

| Tissue | Dose<br>[mg/kg b.w./d,<br>p.o.] | Tissue level [ng/g wet weight] |                          |                          |                         |
|--------|---------------------------------|--------------------------------|--------------------------|--------------------------|-------------------------|
|        |                                 | <b>4-95</b>                    | <b>5-95</b>              | <b>4,5-95</b>            | <b>ΣOH-PCB</b>          |
| Blood  | 0.1 (n=8)                       | 8.1 ± 3.9                      | 0.20 ± 0.28 <sup>‡</sup> | 2.2 ± 3.1 <sup>‡</sup>   | 11 ± 5.4                |
|        | 1 (n=5)                         | 82 ± 17                        | 2.5 ± 2.5 <sup>‡</sup>   | 5.1 ± 4.4 <sup>‡</sup>   | 90 ± 19                 |
|        | 6 (n=7)                         | 270 ± 130                      | 6.6 ± 4.2                | 18 ± 6.8                 | 290 ± 140* <sup>#</sup> |
| Liver  | 0.1 (n=10)                      | 3.0 ± 1.7                      | 1.5 ± 0.5                | 0.45 ± 0.18 <sup>‡</sup> | 4.9 ± 2.2               |
|        | 1 (n=6)                         | 25 ± 9.3                       | 13 ± 5.1                 | 2.5 ± 1.4                | 40 ± 15*                |
|        | 6 (n=8)                         | 130 ± 65                       | 75 ± 45                  | 12 ± 8.0                 | 220 ± 110* <sup>#</sup> |

<sup>‡</sup> Levels below detection limit (see Table S1 for QA/QC values).

\* Significantly higher than 0.1 mg/kg/d treatment group, p<0.05.

<sup>#</sup> Significantly higher than 1 mg/kg/d treatment group.

Data presented as mean ± standard deviation.



**Table S4B.** Comparison of tissue levels of hydroxylated metabolites of PCB 95 in dams *versus* age-matched congenic female mice exposed to racemic PCB 95.

| Tissue  | Dose<br>[mg/kg<br>b.w./d, p.o.] | Tissue level [ng/g wet weight] |                            |                          |                            |
|---------|---------------------------------|--------------------------------|----------------------------|--------------------------|----------------------------|
|         |                                 | Blood                          |                            | Liver                    |                            |
|         |                                 | Dams <sup>a</sup>              | Adult females <sup>b</sup> | Dams <sup>a</sup>        | Adult females <sup>b</sup> |
| 3-103   | 0.1                             | ND                             | ND                         | ND                       | ND                         |
|         | 1                               | ND                             | 4.5 ± 0.6                  | ND                       | 5.4 ± 1.3                  |
|         | 6                               | ND                             | 9.7 ± 4.5                  | ND                       | 22 ± 15                    |
| 4-95    | 0.1                             | 8.1 ± 3.9                      | 26 ± 10                    | 3.0 ± 1.7                | ND                         |
|         | 1                               | 82 ± 17                        | 149 ± 29                   | 25 ± 9.3                 | 40 ± 6.4                   |
|         | 6                               | 270 ± 130                      | 280 ± 110                  | 130 ± 65                 | 140 ± 66                   |
| 5-95    | 0.1                             | 0.20 ± 0.28                    | ND                         | 1.5 ± 0.5                | 3.9 ± 0.9                  |
|         | 1                               | 2.5 ± 2.5                      | 2.5 ± 2.9                  | 13 ± 5.1                 | 34 ± 21                    |
|         | 6                               | 6.6 ± 4.2                      | 12.4 ± 2.3                 | 75 ± 45                  | 72 ± 35                    |
| 4,5-95  | 0.1                             | 2.2 ± 3.1                      | ND                         | 0.45 ± 0.18 <sup>‡</sup> | 3.2 ± 1.5                  |
|         | 1                               | 5.1 ± 4.4                      | 26 ± 9.2                   | 2.5 ± 1.4                | 5.5 ± 0.7                  |
|         | 6                               | 18 ± 6.8                       | 45 ± 20                    | 12 ± 8.0                 | 18 ± 7.5                   |
| ΣOH-PCB | 0.1                             | 11 ± 5.4                       | 34 ± 9.8                   | 4.9 ± 2.2                | 16 ± 14                    |
|         | 1                               | 90 ± 19                        | 180 ± 35                   | 40 ± 15*                 | 84 ± 28                    |
|         | 6                               | 290 ± 140                      | 340 ± 120                  | 220 ± 110                | 250 ± 120                  |

<sup>a</sup> Dams were dosed daily throughout gestation and lactation for 56 days as described under Experimental procedures.

<sup>b</sup> Adult female mice were dosed daily with racemic PCB 95 for 39 days as reported earlier by Kania-Korwel *et al.* (2012).<sup>1</sup>

<sup>#</sup> Statistically significantly different from adult female mice, t-test, p<0.01.

Data presented as mean ± standard deviation.

**Table S5A.** Atropisomeric enrichment of PCB 95 in tissues from dams exposed to racemic PCB 95 during gestation and lactation was independent of dose.

| Dose<br>(mg/kg b.w./d,<br>p.o.) | Enantiomeric fraction (EF) |                                    |                      |                       |                         |                      |                      |                      |
|---------------------------------|----------------------------|------------------------------------|----------------------|-----------------------|-------------------------|----------------------|----------------------|----------------------|
|                                 | Adipose                    |                                    | Blood                |                       | Brain                   |                      | Liver                |                      |
|                                 | BDM <sup>a</sup>           | CD <sup>b</sup>                    | BDM                  | CD                    | BDM                     | CD                   | BDM                  | CD                   |
| 0.1                             | 0.19 ± 0.03<br>(n=6)       | 0.16 ± 0.02<br>(n=9)               | ND <sup>c</sup>      | ND                    | 0.23<br>(n=1)           | 0.19 ± 0.03<br>(n=4) | 0.11 ± 0.02<br>(n=4) | 0.15 ± 0.04<br>(n=4) |
| 1                               | 0.22 ± 0.01<br>(n=4)       | 0.21 ± 0.02*<br>(n=4)              | 0.20<br>(n=1)        | 0.16 ± 0.05<br>(n=3)  | 0.17 ± 0.03<br>(n=0.03) | 0.14 ± 0.02<br>(n=6) | 0.11 ± 0.04<br>(n=5) | 0.11 ± 0.02<br>(n=9) |
| 6                               | 0.23 ± 0.02<br>(n=3)       | 0.26 ± 0.01* <sup>#</sup><br>(n=3) | 0.17 ± 0.02<br>(n=4) | 0.18 ± 0.04<br>(n=10) | 0.15 ± 0.03<br>(n=4)    | 0.18 ± 0.02<br>(n=7) | 0.11 ± 0.02<br>(n=6) | 0.11 ± 0.02<br>(n=7) |

Enantiomeric fraction is defined as  $A_1/(A_1+A_2)$ , where  $A_1$  and  $A_2$  are areas of first and second eluting peak, respectively. Data presented as mean ± standard deviation. In several samples, the first eluting atropisomer, E<sub>1</sub>-95 was below the detection limit, resulting in a calculated EF = 0.0. These EF values were excluded from the calculation of the mean EF values to avoid overestimating the enrichment.

<sup>a</sup> BDM - ChiralDex B-DM column (2,3-di-O-methyl-6-tert-butyl-silyl-β-cyclodextrin).

<sup>b</sup> CD - Chirasil-Dex column (2,3,6-tri-O-methyl-β-cyclodextrin).

<sup>c</sup> ND - below detection limit.

\* Significantly higher than 0.1 mg/kg/d treatment group, p<0.05.

<sup>#</sup> Significantly higher than 1 mg/kg/d treatment group.

Data presented as mean ± standard deviation.

**Table 5B.** Comparison of atropisomeric enrichment of PCB 95 in tissues from dams *versus* age-matched congenic female mice exposed to racemic PCB 95.

| Tissue  | Dose<br>[mg/kg b.w./d, p.o.] | Enantiomeric fraction (EF) |                            |
|---------|------------------------------|----------------------------|----------------------------|
|         |                              | Dams <sup>a</sup>          | Adult females <sup>b</sup> |
| Adipose | 0.1                          | 0.19 ± 0.03                | 0.18 ± 0.00                |
|         | 1                            | 0.22 ± 0.01                | 0.21 ± 0.02)               |
|         | 6                            | 0.23 ± 0.02 <sup>#</sup>   | 0.19 ± 0.01                |
| Blood   | 0.1                          | ND <sup>c</sup>            | ND                         |
|         | 1                            | 0.20                       | ND                         |
|         | 6                            | 0.17 ± 0.02 <sup>#</sup>   | 0.13 ± 0.01                |
| Brain   | 0.1                          | 0.23                       | ND                         |
|         | 1                            | 0.17 ± 0.03                | 0.17 ± 0.02                |
|         | 6                            | 0.15 ± 0.03                | 0.13 ± 0.01                |
| Liver   | 0.1                          | 0.11 ± 0.02                | ND                         |
|         | 1                            | 0.11 ± 0.04                | 0.12 ± 0.01                |
|         | 6                            | 0.11 ± 0.02 <sup>#</sup>   | 0.09 ± 0.01                |

Enantiomeric fraction is defined as A1/(A1+A2), where A1 and A2 are areas of first and second eluting peak, respectively. Data presented as mean ± standard deviation. Samples were analyzed using a BDM column (ChiralDex B-DM; 2,3-di-O-methyl-6-tert-butyl-silyl-β-cyclodextrin).

<sup>a</sup> Dams were dosed daily throughout gestation and lactation for 56 days as described under Experimental procedures.

<sup>b</sup> Adult female mice were dosed daily with racemic PCB 95 for 39 days as reported earlier by Kania-Korwel *et al.* (2012).<sup>1</sup>

<sup>c</sup> ND – below detection limit.

<sup>#</sup> Statistically significantly different from adult female mice, t-test, p<0.01.

Data presented as mean ± standard deviation.

**Table S6A.** Atropisomeric enrichment of hydroxylated metabolites of PCB 95 in tissues from dams exposed to racemic PCB 95 during gestation and lactation was independent of dose.

| Tissue | Dose<br>[mg/kg b.w./d,<br>p.o.] | Enantiomeric fraction (EF) |                           |                          |
|--------|---------------------------------|----------------------------|---------------------------|--------------------------|
|        |                                 | <b>4-95<sup>a</sup></b>    | <b>4,5-95<sup>b</sup></b> | <b>X'-95<sup>b</sup></b> |
| Blood  | 0.1                             | ND <sup>c</sup>            | ND                        | ND                       |
|        | 1                               | 0.13 <sup>#</sup>          | NR <sup>d</sup>           | ND                       |
|        | 6                               | 0.15 ± 0.06<br>(n=5)       | 0.47 ± 0.06*<br>(n=7)     | 1.0                      |
| Liver  | 0.1                             | ND                         | ND                        | 0.78 (n=1)               |
|        | 1                               | ND                         | 0.26 (n=1)                | 0.80 ± 0.11*<br>(n=5)    |
|        | 6                               | 0.26<br>(n=1)              | 0.41 ± 0.05<br>(n=4)      | 0.78 ± 0.03<br>(n=5)     |

<sup>a</sup> Analysis conducted on BGB column (BGB-172, 20% tert-butyldimethyl-silyl-β-cyclodextrin).

<sup>b</sup> Analysis conducted on CD column (Chirasil-Dex, 2,3,6-tri-O-methyl-β-cyclodextrin).

<sup>c</sup> ND – below detection limit.

<sup>d</sup> NR – not resolved.

<sup>#</sup> Samples were pooled for the analysis to improve detection.

\* Different from liver in 6 mg/kg/d dose group, p<0.05.

Data presented as mean ± standard deviation.

**Table S6B.** Comparison of atropisomeric enrichment of hydroxylated metabolites of PCB 95 in tissues from dams *versus* age-matched congenic female mice exposed to racemic PCB 95.

| Metabolite          | Dose<br>[mg/kg<br>b.w./d, p.o.] | Enantiomeric fraction (EF) |                                  |             |                      |
|---------------------|---------------------------------|----------------------------|----------------------------------|-------------|----------------------|
|                     |                                 | Blood                      |                                  | Liver       |                      |
|                     |                                 | <b>Dams<sup>a</sup></b>    | <b>Adult females<sup>b</sup></b> | <b>Dams</b> | <b>Adult females</b> |
| 4-95 <sup>c</sup>   | 0.1                             | ND <sup>e</sup>            | ND                               | ND          | ND                   |
|                     | 1                               | 0.13 <sup>g</sup>          | 0.10 ± 0.02                      | ND          | ND                   |
|                     | 6                               | 0.15 ± 0.06                | 0.07                             | 0.26        | 0.21 ± 0.03          |
| 4,5-95 <sup>d</sup> | 0.1                             | ND                         | ND                               | ND          | ND                   |
|                     | 1                               | NR <sup>f</sup>            | ND                               | 0.26 (n=1)  | ND                   |
|                     | 6                               | 0.47 ± 0.06 <sup>#</sup>   | 0.34 ± 0.02                      | 0.41 ± 0.05 | 0.50 ± 0.07          |

<sup>a</sup> Dams were dosed daily throughout gestation and lactation for 56 days as described under Experimental procedures.

<sup>b</sup> Adult female mice were dosed daily with racemic PCB 95 for 39 days as reported earlier by Kania-Korwel *et al.* (2012).<sup>1</sup>

<sup>c</sup> Analysis conducted on BGB column (BGB-172, 20% tert-butyldimethyl-silyl-β-cyclodextrin).

<sup>d</sup> Analysis conducted on BDM column (ChiralDex B-DM, 2,3-di-O-methyl-6-tert-butyl-silyl-β-cyclodextrin).

<sup>e</sup> ND – below detection limit.

<sup>f</sup> NR – not resolved.

<sup>g</sup> Samples were pooled for the analysis to improve detection.

<sup>#</sup> Different from adult females, t-test, p<0.01.

Data presented as mean ± standard deviation.

**Table S7.** Levels and atropisomeric enrichment of PCB 95 in blood and liver from pups exposed to racemic PCB 95 via the maternal diet; see Experimental procedures for additional details (subset of data published in Barnhart *et al.*, manuscript in preparation).

| Dose<br>(mg/kg b.w./d,<br>p.o.) | Blood                      |                  |                 | Liver                      |                           |                           |
|---------------------------------|----------------------------|------------------|-----------------|----------------------------|---------------------------|---------------------------|
|                                 | Level<br>(ng/g wet weight) | EF <sup>a</sup>  |                 | Level<br>(ng/g wet weight) | EF <sup>a</sup>           |                           |
|                                 |                            | BDM <sup>b</sup> | CD <sup>c</sup> |                            | BDM                       | CD                        |
| 0.1                             | $1.5 \pm 1.5^d$ (n=5)      | ND <sup>e</sup>  | ND              | $5.0 \pm 2.1$ (n=12)       | $0.00 \pm 0.00$<br>(n=6)  | $0.00 \pm 0.01$<br>(n=8)  |
| 1                               | $7.4 \pm 4.9$ (n=7)        | ND               | ND              | $15 \pm 4.9$ (n=10)        | $0.01 \pm 0.03$<br>(n=10) | $0.01 \pm 0.01$<br>(n=10) |
| 6                               | $19 \pm 16$ (n=5)          | 0.00 (n=1)       | ND              | $75 \pm 48$ (n=9)          | $0.01 \pm 0.02$<br>(n=9)  | $0.03 \pm 0.03$<br>(n=9)  |

<sup>a</sup> Samples with EF = 0.00 were included in the calculation of the mean.

<sup>b</sup> Analysis conducted on BDM column (ChiralDex B-DM, 2,3-di-O-methyl-6-tert-butyl-silyl-β-cyclodextrin).

<sup>c</sup> Analysis conducted on CD - Chirasil-Dex column (2,3,6-tri-O-methyl-β-cyclodextrin).

<sup>d</sup> Levels below detection limit (for details and QA/QC see Barnhart *et al.*, manuscript in preparation).

<sup>e</sup> ND – below detection limit.

Data presented as mean ± standard deviation.

**Table S8.** Levels of hydroxylated metabolites of PCB 95 in blood and liver from pups exposed to racemic PCB 95 via the maternal diet.

| Tissue | Dose<br>[mg/kg b.w./d,<br>p.o.] | Tissue level [ng/g wet weight]  |                                 |                                 |                 |
|--------|---------------------------------|---------------------------------|---------------------------------|---------------------------------|-----------------|
|        |                                 | <b>4-95</b>                     | <b>5-95</b>                     | <b>4,5-95</b>                   | <b>ΣOH</b>      |
| Blood  | 0.1                             | $1.6 \pm 0.7^a$                 | $0.37 \pm 0.43^a$               | $0.74 \pm 0.52^a$               | $2.7 \pm 1.1^a$ |
|        | 1                               | <b><math>7.0 \pm 3.2</math></b> | $0.70 \pm 0.45^a$               | $2.5 \pm 1.2^a$                 | $10 \pm 4^a$    |
|        | 6                               | <b><math>31 \pm 17</math></b>   | $0.48 \pm 0.68^a$               | <b><math>6.5 \pm 3.4</math></b> | $38 \pm 20^a$   |
| Liver  | 0.1                             | $0.83 \pm 1.9^a$                | $0.18 \pm 0.55^a$               | $1.3 \pm 1.1^a$                 | $2.1 \pm 2.2^a$ |
|        | 1                               | $0.43 \pm 1.1^a$                | $0.72 \pm 1.8^a$                | $0.08 \pm 0.1^a$                | $1.0 \pm 2.1^a$ |
|        | 6                               | <b><math>4.4 \pm 4.1</math></b> | <b><math>5.6 \pm 9.9</math></b> | $1.5 \pm 2.0^a$                 | $12 \pm 12^a$   |

<sup>a</sup> Levels below detection limit (for details and QA/QC see Barnhart *et al.*, manuscript in preparation).

**Table S9.** Atropisomeric enrichment of selected chiral PCBs in extracts from human brain samples. For details on sample extraction and PCB levels see Mitchell *et al.* (2012).<sup>3</sup>

| Sample                  | Enantiomeric fraction            |                         |             |
|-------------------------|----------------------------------|-------------------------|-------------|
|                         | PCB 95                           | PCB 136                 | PCB 149     |
| Subject 1<br>IDIC156294 | <b>0.50</b>                      | ND                      | <b>0.50</b> |
| Subject 2<br>IDIC156856 | ND                               | <b>0.49</b>             | <b>0.50</b> |
| Subject 3<br>IDIC157014 | <b>0.50</b> (0.50 <sup>b</sup> ) | ND (0.50 <sup>b</sup> ) | <b>0.50</b> |
| Subject 4<br>IDIC157041 | <b>0.50</b> (0.44 <sup>b</sup> ) | ND (0.54 <sup>b</sup> ) | ND          |

<sup>a</sup> IDIC denotes samples from subjects with an idiopathic autism spectrum disorder (ASD).

<sup>b</sup> Analysis using CD column (Chirasil-Dex, 2,3,6-tri-O-methyl- $\beta$ -cyclodextrin) and temperature program as described under “Atropselective analysis of human brain samples” (next page). Samples were introduced using HS-SPME with 100  $\mu$ m PDMS fiber, extraction of 60 min at 60°C and desorption for 5 min at 250°C. For details on sample extraction and PCB levels see Mitchell *et al.* (2012).<sup>3</sup>



**Atropselective analysis of human brain samples.** The origin of human brain samples from individuals with idiopathic ASD and the extraction and quantification of PCBs was previously published by Mitchell *et al.* (2012).<sup>3</sup> The extracts were further analyzed using an Agilent 7890 chromatograph connected to 5975C mass selective detector and equipped with a Chirasil-Dex enantioselective column: (CD, 2,3,6-tri-O-methyl- $\beta$ -cyclodextrin, 30 m x 250  $\mu$ m x 0.39  $\mu$ m, Agilent, Santa Clara, CA). The injector temperature was 250 °C. Samples were introduced to gas chromatograph by means of liquid injection or head space-solid phase microextraction (HS-SPME). For HS-SPME, samples were placed in glass vial with 1.5 mL of phosphate buffer (pH 7.4) and the head space was extracted with a 100  $\mu$ m PDMS fiber (Sigma-Aldrich, St. Louis, MO, USA) for 60 min at 60°C, followed by desorption for 5 min at 250°C. The following temperature program was used for gas chromatographic analysis: 60 °C for 1 min, 10 °C/min to 150 °C, 1 °C/min to 200 °C, hold for 30 min. The injector was kept at 250 °C. The two most intense isotope ions were used for selected ion monitoring ( $m/z$  325.9 and 327.9 for PCB 95, and  $m/z$  359.8 and 361.8 for PCBs 136 and 149). Enantiomeric fraction was calculated as  $A_1/(A_1+A_2)$ , where  $A_1$  and  $A_2$  are areas of first and second eluting peak, respectively. The criteria used to evaluate the quality of the EF value determinations were in line with those used by Harrad *et al.* (2006),<sup>4</sup> except that a signal to noise ratio of  $S/N > 3$  was used.

## References:

- (1) Kania-Korwel, I., Shaikh, N., Hornbuckle, K. C., Robertson, L. W., and Lehmler, H.-J. (2007) Enantioselective disposition of PCB 136 (2,2',3,3',6,6'-hexachlorobiphenyl) in C57BL/6 mice after oral and intraperitoneal administration. *Chirality* 19, 56-66.
- (2) Kania-Korwel, I., Barnhart, C. D., Stamou, M., Truong, K. M., El-Komy, M. H., Lein, P. J., Veng-Pedersen, P., and Lehmler, H. J. (2012) 2,2',3,5',6-Pentachlorobiphenyl (PCB 95) and its hydroxylated metabolites are enantiomerically enriched in female mice. *Environ. Sci. Technol.* 46, 11393-11401.
- (3) Mitchell, M. M., Woods, R., Chi, L. H., Schmidt, R. J., Pessah, I. N., Kostyniak, P. J., and LaSalle, J. M. (2012) Levels of select PCB and PBDE congeners in human postmortem brain reveal possible environmental involvement in 15q11-q13 duplication autism spectrum disorder. *Environ. Mol. Mutagen.* 53, 589-598.
- (4) Harrad, S., Ren, J., Hazrati, S., and Robson, M. (2006) Chiral signatures of PCB#s 95 and 149 in indoor air, grass, duplicate diets and human faeces. *Chemosphere* 63, 1368-1376.
